# Supplementary material
Source: Springer Nature journal article supplement (https://www.springermedizin.de/resource/supplementary/12958_2013_1122_MOESM4_ESM.pdf/9566864)

**A**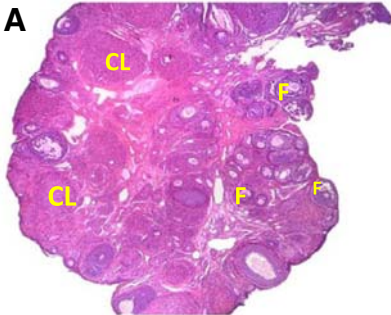**B**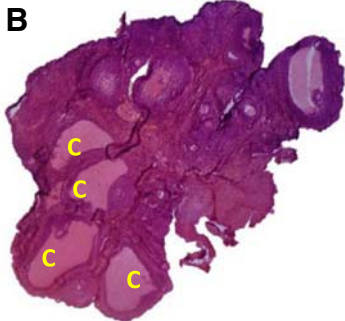**C**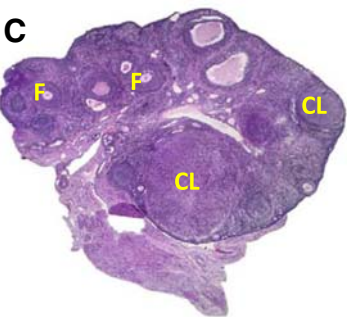**D**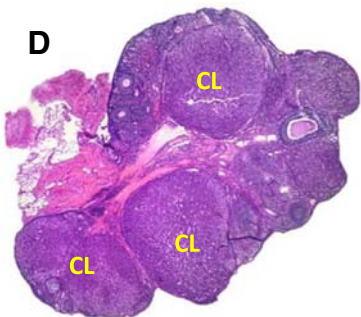**E**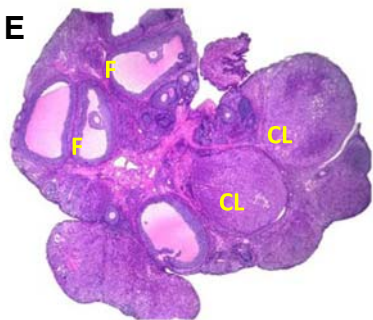**1 mm**

Supplement: MOESM4 [file 9566864]
